# Supplementary material for: Identification of and Mechanistic Insights into SARS-CoV-2 Main Protease Non-Covalent Inhibitors: An In-Silico Study
Source: MDPI journal article supplement (doi:10.3390/ijms24044237), 2023-02-20
Supplement: s1 [file s1]

# Identification of and Mechanistic Insights into SARS-CoV-2 Main Protease Non-Covalent Inhibitors: An In-Silico Study

Jian-Xin Shen<sup>1,†</sup>, Wen-Wen Du<sup>1,†</sup>, Yuan-Ling Xia<sup>1</sup>, Zhi-Bi Zhang<sup>1,2</sup>, Ze-Fen Yu<sup>1</sup>, Yun-Xin Fu<sup>1,3,\*</sup> and Shu-Qun Liu<sup>1,\*</sup>

<sup>1</sup> State Key Laboratory for Conservation and Utilization of Bio-Resources in Yunnan & School of Life Sciences, Yunnan University, Kunming 650091, China; JianxinS0806@163.com (J.-X.S.); wenwendu2014@hotmail.com (W.-W.D.); xiayl@ynu.edu.cn (Y.-L.X.); zhangzhibi@kmmu.edu.cn (Z.-B.Z.); zfyu@ynu.edu.cn (Z.-F.Y.)

<sup>2</sup> Yunnan Key Laboratory of Stem Cell and Regenerative Medicine and Biomedical Engineering Research Center, Kunming Medical University, Kunming 650500, China

<sup>3</sup> Human Genetics Center and Department of Biostatistics and Data Science, School of Public Health, The University of Texas Health Science Center, Houston, TX 77030, USA

\* Correspondence: Yunxin.Fu@uth.tmc.edu (Y.-X.F.); shuqunliu@ynu.edu.cn (S.-Q.L.)

<sup>†</sup> These authors contributed equally to this work

**Table S1.** ZINC IDs of the 593 hit compounds and their respective score values (kcal/mol) of the top-ranked docking pose (see the file Table\_S1.xlsx).

**Table S2.** Predicted parameters of Lipinski's rule of five (Ro5) and ADMET for the 78 potential candidate compounds (PCCs) and the reference compound ML188 (see the file Table\_S2.xlsx).

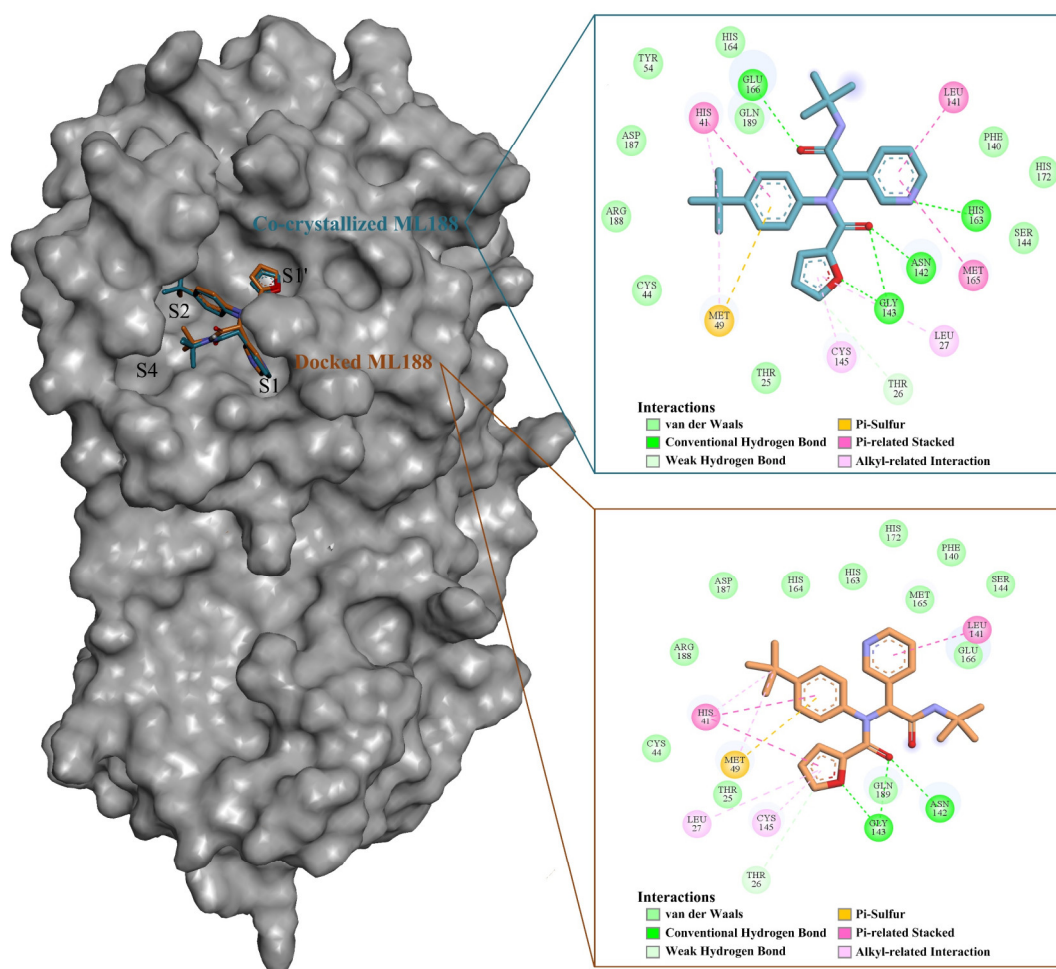

**Figure S1.** The co-crystallized and docked ML188 within the substrate-binding cavity of the SARS-CoV-2 Mpro. The two enlarged panels show the 2D representations of the binding modes of the co-crystallized ML188 (in dark cyan) and docked ML188 (in orange) with Mpro residues, respectively.

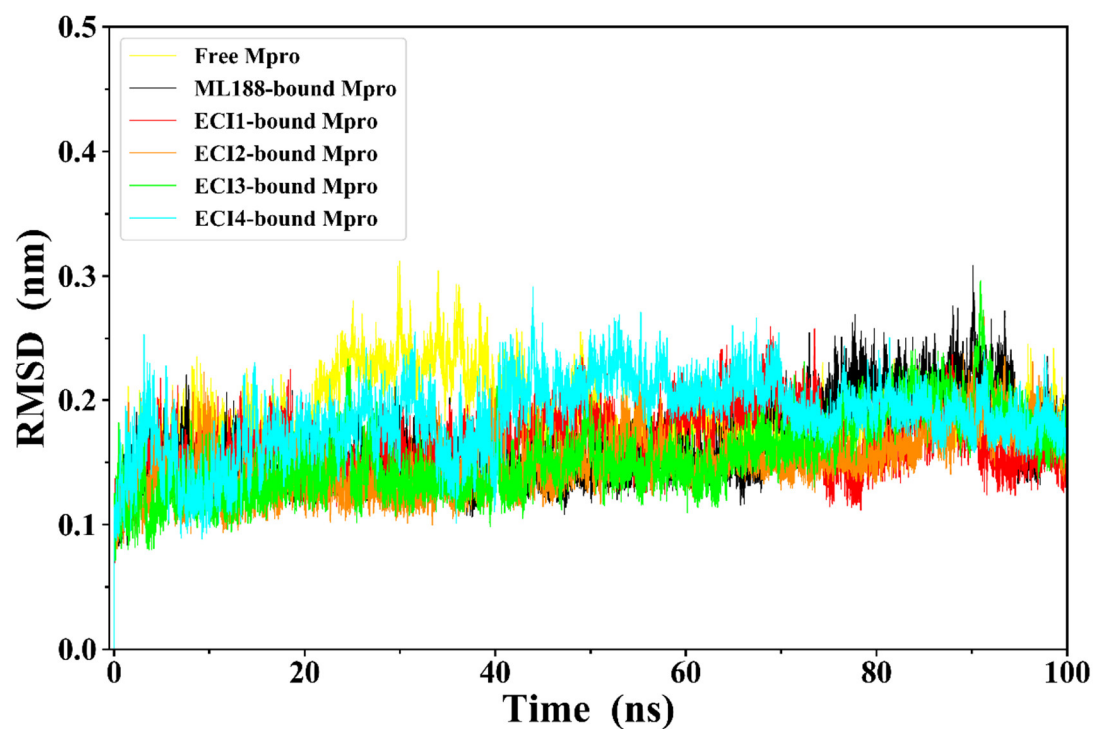

**Figure S2.** Time-dependent  $C_{\alpha}$  root mean square deviation (RMSD) values of the free Mpro (without ligand) and the ligand-bound Mpro with respect to their respective starting structures during the 100-ns MD simulation.

**File S1.** Python script for constructing free energy landscapes (FELs) of the reference complex Mpro-ML188 and the three effective complexes Mpro-ECI2, Mpro-ECI3, and Mpro-ECI4 (see the file File\_S1.py).
